# Supplementary material for: Alpha-arylphorin is a mitogen in the Heliothis virescens midgut cell secretome upon Cry1Ac intoxication
Source: PeerJ. 2017 Oct 3;5:e3886. doi: 10.7717/peerj.3886 (PMC5629956; doi:10.7717/peerj.3886)
Supplement: Table S1 [file peerj-05-3886-s003.xlsx]

## Sheet: Sheet4
			Normalized spectral counts
Contig #	Protein name	Species	Buffer	Cry1Ac
1086	V-type proton ATPase catalytic subunit B	Manduca sexta	192	186
2427	V-type proton ATPase catalytic subunit A	Heliothis virescens	118	91
818	Aminopeptidase-N	Heliothis virescens	112	125
2948	Glutamate dehydrogenase	Bombyx mori	102	96
3863	ATP synthase	Helicoverpa zea	100	83
1178	Heat shock protein	Helicoverpa armigera	96	88
28	ATP synthase	Bombyx mori	92	79
2219	60 kDa heat shock mitochondrial-like	Chilo suppressalis	89	84
2029	Disulfide isomerase precursor	Bombyx mori	85	96
704	Transferrin	Harpegnathos saltator	82	106
667	Aminopeptidase-N	Heliothis virescens	78	75
1442	Citrate synthase	Danaus plexippus	77	63
14	Spectrin alpha	Danaus plexippus	69	80
997	Aminopeptidase-N	Heliothis virescens	67	0
1512	Peroxisomal multifunctional enzyme type 2	Bombyx mori	66	58
2545	Heat shock protein 70	Agrotis ipsilon	58	54
457	Heat shock 70 kda protein cognate 5	Spodoptera exigua	53	50
918	Aconitate mitochondrial-like	Antheraea yamamai	51	50
786	Midgut aminopeptidase N2	Helicoverpa armigera	50	60
942	110 kDa aminopeptidase	Heliothis virescens	49	38
3030	Glycosyl hydrolase family 31	Bombyx mori	47	63
363	Glucosidase ii alpha-subunit	Spodoptera frugiperda	45	48
3692	Disulfide-isomerase like protein ERp57	Bombyx mori	44	36
7224	Enoyl-CoA hydratase	Agrotis segetum	43	28
1026	Chlorophyllide A binding protein precursor	Helicoverpa armigera	42	32
3184	Dihydrolipoamide dehydrogenase	Bombyx mori	42	48
845	Polycalin	Helicoverpa armigera	41	43
2610	Aspartate aminotransferase	Bombyx mori	40	36
4400	Arginine kinase	Heliothis virescens	39	45
1039	Succinate dehydrogenase	Danaus plexippus	37	34
3101	Vacuolar ATP synthase subunit H	Manduca sexta	36	36
1328	Alkaline phosphatase	Heliothis virescens	35	54
1893	Ribosomal protein L4	Heliothis virescens	32	29
11299	Ribosomal protein L5	Manduca sexta	31	30
3815	Transferrin	Helicoverpa armigera	31	42
1343	Alkaline phosphatase	Heliothis virescens	30	47
3473	Catalase	Helicoverpa armigera	30	33
5397	H+ transporting ATP synthase gamma subunit	Bombyx mori	28	24
1537	Protein mesh isoform x1	Bombyx mori	28	35
16197	Ribosomal protein s3	Euphydryas aurinia	27	23
3956	Vacuolar ATP synthase subunit E	Bombyx mori	27	30
2924	Glycosyl hydrolase family 31	Bombyx mori	26	53
1831	Fumarate hydratase	Plutella xylostella	25	25
13828	Ribosomal protein s4	Spodoptera frugiperda	25	23
2738	Alpha amylase precursor	Bombyx mori	24	33
666	Aminopeptidase N	Heliothis virescens	24	15
3833	Alpha amylase precursor	Bombyx mori	23	31
14248	Ribosomal protein s8	Spodoptera frugiperda	23	19
4901	Beta-fructofuranosidase 2	Manduca sexta	22	27
1219	Carnitine o-acetyltransferase	Danaus plexippus	22	22
2771	Glycosyl hydrolase family 31	Bombyx mori	22	25
369	NADPH cytochrome P450 reductase	Helicoverpa armigera	22	21
10883	Ribosomal protein L23A	Manduca sexta	22	12
43	Spectrin beta chain	Danaus plexippus	22	13
1301	Calreticulin	Bombyx mori	20	26
1557	Dolichyl-diphosphooligosaccharide--protein glycosyltransferase subunit 2	Bombyx mori	20	14
13921	Ribosomal protein L10A	Heliconius melpomene cythera	20	14
4363	Mitochondrial processing peptidase beta subunit	Papilio xuthus	19	16
3340	Vanin-like protein 2 isoform X2	Bombyx mori	19	23
4479	Aldehyde dehydrogenase	Amyelois transitella	19	19
14074	Trypsin-like protease	Heliothis virescens	19	21
3674	Vacuolar ATPase subunit C	Bombyx mori	18	11
24570	40S ribosomal protein S16	Spodoptera frugiperda	17	12
1971	4-hydroxybutyrate transferase	Papilio xuthus	17	17
1248	Abnormal wing disc-like protein	Spodoptera litura	17	14
3550	Aminopeptidase N	Heliothis virescens	17	8
15625	Fatty acid-binding protein 3	Helicoverpa armigera	17	10
26428	Histone h4	Larimichthys crocea	17	20
3230	NADPH-specific isocitrate dehydrogenase	Bombyx mori	17	11
18938	Ribosomal protein L26	Manduca sexta	17	14
8497	Thioredoxin peroxidase	Helicoverpa armigera	17	12
4733	Ribosomal protein l7a	Spodoptera exigua	17	17
1574	Acyl- oxidase	Agrotis segetum	16	15
15284	Ribosomal protein L13	Helicoverpa zea	16	22
16176	Ribosomal protein l9	Spodoptera frugiperda	16	15
13997	Ribosomal protein s18	Spodoptera frugiperda	16	13
3711	3-hydroxyisobutyryl-CoA hydrolase	Bombyx mori	16	12
6938	Dihydrolipoamide dehydrogenase	Papilio xuthus	16	13
13480	Trypsin-like protease	Heliothis virescens	16	16
24455	Ribosomal protein S11	Heliothis virescens	15	15
1921	Hydroxysteroid dehydrogenase	Bombyx mori	15	12
6548	Ribosomal protein l3	Spodoptera frugiperda	15	15
28569	Ribosomal protein S15A	Bombyx mori	15	15
22575	Ribosomal protein S19	Spodoptera frugiperda	15	11
14441	Ribosomal protein S3A	Spodoptera frugiperda	15	8
12709	40S ribosomal protein S6	Spodoptera frugiperda	14	9
17557	ribosomal protein S5	Spodoptera frugiperda	14	11
7236	Short-chain dehydrogenase	Heliothis virescens	14	11
4983	Actin	Bactrocera dorsalis	14	12
3269	2-hydroxyphytanoyl-CoA lyase	Bombyx mori	13	12
4917	Thiolase 1	Heliothis virescens	13	15
2967	Angiotensin converting enzyme	Spodoptera littoralis	13	19
11494	Cytochrome c	Spodoptera litura	13	9
1619	Dihydrolipoamide acetyltransferase component of pyruvate dehydrogenase	Bombyx mori	13	7
28856	Fatty acid-binding protein 2	Helicoverpa armigera	13	9
4105	Fructose-biphosphate aldolase	Papilio xuthus	13	14
2679	Glucose dehydrogenase	Danaus plexippus	13	13
5035	Aldehyde dehydrogenase	Papilio polytes	13	7
13698	Serine protease	Heliothis virescens	13	7
16574	Ribosomal protein s14	Plutella xylostella	13	10
22750	60S ribosomal protein L18	Spodoptera frugiperda	12	8
16986	QM protein	Heliothis virescens	12	11
16867	Cyclophilin A	Mythimna separata	12	5
6221	Elongation factor 1 gamma	Bombyx mori	12	11
4982	Extracellular domains-containing protein cg31004-like	Danaus plexippus	12	11
7284	Hypothetical protein KGM_20502	Danaus plexippus	12	8
632	Lamin dm0-like isoform x1	Bombyx mori	12	7
21056	Ribosomal protein L14	Spodoptera frugiperda	12	14
20187	Ribosomal protein L17	Manduca sexta	12	9
19441	Ribosomal protein L18a	Spodoptera frugiperda	12	12
12837	Ribosomal protein L6e	Spodoptera exigua	12	10
16930	Ribosomal protein s25	Spodoptera frugiperda	12	13
725	Venom dipeptidyl peptidase 4-like	Danaus plexippus	12	14
1789	14-3-3 epsilon	Plutella xylostella	11	8
10939	40S ribosomal protein SA	Bombyx mori	11	6
4767	Alkaline phosphatase	Heliothis virescens	11	14
11136	Chymotrypsin-like protease C6	Heliothis virescens	11	6
3102	Pyruvate dehydrogenase	Bombyx mori	11	8
2739	Pyruvate kinase	Papilio xuthus	11	5
14607	Ribosomal protein l7	Spodoptera frugiperda	11	15
24502	Ribosomal protein S12	Spodoptera frugiperda	11	16
19861	Ribosomal protein s7	Spodoptera frugiperda	11	10
1033	Translation elongation factor 2	Spodoptera exigua	11	12
11453	Trypsin-like proteinase	Heliothis virescens	11	10
11699	60S ribosomal protein L15	Spodoptera frugiperda	10	15
4988	Carboxyl/choline esterase CCE016a	Helicoverpa armigera	10	10
3520	Cytosolic non-specific dipeptidase	Danaus plexippus	10	5
3902	Malate mitochondrial	Bombyx mori	10	6
31571	Membralin-like isoform x1	Apis mellifera	10	8
1877	Mitochondrial aldehyde dehydrogenase	Bombyx mori	10	12
3625	Probable methylmalonate-semialdehyde dehydrogenase	Danaus plexippus	10	8
21083	Ribosomal protein L12	Spodoptera frugiperda	10	7
20138	Ribosomal protein L23	Bombyx mori	10	7
19568	Ribosomal protein S9	Amyelois transitella	10	9
27240	RNA exonuclease 1 homolog	Danaus plexippus	10	13
7415	Serpin-2	Spodoptera exigua	10	13
2162	Succinate-semialdehyde dehydrogenase	Bombyx mori	10	7
6963	3-ketoacyl-CoA	Heliothis virescens	10	3
7464	Protein canopy-1-like	Bombyx mori	10	7
866	Alkaline phosphatase tissue-nonspecific isozyme	Chilo suppressalis	9	16
26121	Cytochrome b5	Helicoverpa armigera	9	8
5104	Cytosolic malate dehydrogenase	Bombyx mori	9	8
17773	Histone H2B-like protein	Bombyx mori	9	9
13518	Manganese superoxide dismutase	Helicoverpa armigera	9	8
15030	Ribosomal protein L19	Heliconius melpomene cythera	9	7
5815	Ribosomal protein L21	Helicoverpa zea	9	11
1102	Ribosomal protein l8	Operophtera brumata	9	8
5013	S-adenosyl-L-homocysteine hydrolase	Bombyx mori	9	10
5894	Vacuolar ATP synthase subunit D	Danaus plexippus	9	17
10250	Vacuolar ATP synthase subunit G	Bombyx mori	9	8
25360	Ribosomal protein s24	Spodoptera frugiperda	9	8
12302	40S ribosomal protein S2	Plutella xylostella	8	12
5263	Beta-glucosidase precursor	Spodoptera frugiperda	8	11
4099	Carboxyl/choline esterase CCE006d	Helicoverpa armigera	8	10
3826	Glucosidase precursor	Bombyx mori	8	12
10	Nucleoprotein tpr	Danaus plexippus	8	5
19405	Ribosomal protein l13a	Spodoptera frugiperda	8	7
24143	Ribosomal protein l27a		8	4
29126	Ribosomal protein L36A	Plutella xylostella	8	8
23550	Ribosomal protein S15	Bombyx mori	8	2
26371	Ribsomal protein S20e	Papilio dardanus	8	7
3097	Thioredoxin peroxidase	Bombyx mori	8	4
4812	Very long-chain specific acyl-CoA dehydrogenase	Danaus plexippus	8	4
22608	60S ribosomal protein L32	Spodoptera frugiperda	7	6
920	Aminopeptidase N5	Helicoverpa armigera	7	3
3329	Antennal esterase CXE4	Spodoptera littoralis	7	2
77	Apolipophorin precursor protein	Bombyx mori	7	6
4422	Beta-glucosidase precursor	Danaus plexippus	7	9
9980	Carboxyl/choline esterase CCE006a	Helicoverpa armigera	7	11
8867	Chymotrypsin	Helicoverpa armigera	7	3
10963	Apolipoprotein D-like protein	Helicoverpa armigera	7	3
15797	Farnesoic acid o-methyl transferase	Biston betularia	7	7
1103	Fat body aminopeptidase	Spodoptera litura	7	3
1507	Fimbrin plastin	Danaus plexippus	7	3
10734	Glutathione S-transferase delta 4	Spodoptera litura	7	3
21487	Histone H2A-like protein 2	Bombyx mori	7	0
1573	Probable peroxisomal acyl-coenzyme A oxidase 1	Bombyx mori	7	0
1795	Hypotehtical protein KGM_20514	Danaus plexippus	7	5
33089	Ribosomal protein s21	Euphydryas aurinia	7	8
10403	Farnesoic acid o-methyl transferase	Papilio machaon	7	7
10064	Carboxyl/choline esterase CCE006a	Helicoverpa armigera	6	10
4197	Carboxylesterase	Helicoverpa armigera	6	6
28270	Cellular retinoic acid binding protein		6	0
4242	Phosphate transport protein	Bombyx mori	6	6
11398	Prostamide/prostaglandin F synthase-like	Amyelois transitella	6	4
5058	Protein disulfide isomerase	Helicoverpa armigera	6	9
6806	Pyruvate dehydrogenase e1 component subunit	Danaus plexippus	6	4
22667	Ribosomal protein L35A	Spodoptera frugiperda	6	10
17134	Single domain major allergen 2 protein	Helicoverpa armigera	6	5
15532	Soluble alkaline phosphatase	Bombyx mori	6	5
6000	Trypsin-like protease	Mamestra configurata	6	5
10915	Ribosomal protein s10	Spodoptera frugiperda	6	4
11807	Chymotrypsin-like protease	Heliothis virescens	6	3
12719	Serine protease	Heliothis virescens	6	5
13389	Glycoside hydrolases	Spodoptera frugiperda	6	5
13427	Ribosomal protein s27a	Spodoptera frugiperda	6	10
11716	3-hydroxyisobutyrate dehydrogenase	Bombyx mori	5	3
25973	40S Ribosomal protein S13	Papilio polytes	5	0
3380	Apolipophorin precursor protein	Bombyx mori	5	4
4381	Carboxyl/choline esterase CCE006b	Helicoverpa armigera	5	3
4168	Carboxyl/choline esterase CCE006c	Helicoverpa armigera	5	9
10692	Cu/Zn superoxide dismutase	Helicoverpa armigera	5	5
14933	Glutathione S-transferase	Helicoverpa armigera	5	4
3618	Glyceraldehyde-3-phosphate dehydrogenase	Helicoverpa armigera	5	7
7770	Glyceraldehyde-3-phosphate dehydrogenase	Helicoverpa armigera	5	7
1073	Hydroxysteroid dehydrogenase	Bombyx mori	5	2
5347	Isocitrate dehydrogenase	Bombyx mori	5	2
42	Myosin heavy non-muscle-like	Danaus plexippus	5	3
3116	Probable peroxisomal acyl-coenzyme A oxidase 1	Danaus plexippus	5	0
29592	Ribosomal protein L27	Heliconius melpomene	5	7
17578	Ribosomal protein s23	Papilio polytes	5	4
30904	Ribosomal protein s27	Papilio machaon	5	5
10036	Trans-1,2-dihydrobenzene-1,2-diol dehydrogenase-like isoform X2	Papilio polytes	5	4
5387	Voltage-dependent anion-selective channel	Helicoverpa armigera	5	3
4243	14-3-3 zeta	Heliothis virescens	5	6
6452	Uncharacterized protein LOC101744336	Bombyx mori	5	3
25973	Ribosomal protein s13	Papilio polytes	5	0
27905	60s acidic ribosomal protein p2	Papilio machaon	4	2
15507	Alkaline phosphatase	Bombyx mandarina	4	9
3776	Chlorophyllide A binding protein precursor	Bombyx mori	4	5
5828	Coproporphirynogen oxidase	Bombyx mori	4	0
5264	Cytosolic juvenile hormone binding protein 36 kDa subunit	Bombyx mori	4	3
4478	Enolase partial	Spodoptera litura	4	6
9744	Farnesoic acid O-methyltransferase	Operophtera brumata	4	5
19765	Fatty acid-binding protein 3	Helicoverpa armigera	4	0
27458	FK506-binding protein	Bombyx mori	4	0
8793	Isochorismatase domain containing protein	Bombyx mori	4	2
951	Putative coracle	Operophtera brumata	4	0
34781	Fumarate hydratase	Bombyx mori	4	0
3231	N-acetylgalactosaminyltransferase 7-like	Bombyx mori	4	3
5238	Putative serine protease	Bombyx mori	4	2
2546	Receptor for activated protein kinase C	Helicoverpa armigera	4	4
5248	Ribosomal protein l11	Papilio xuthus	4	5
21269	Ribosomal protein l24	Spodoptera frugiperda	4	5
9264	Serine protease 30	Mamestra configurata	4	3
6014	Triosephosphate isomerase	Helicoverpa armigera	4	4
6276	Uncharacterized protein LOC101745964	Bombyx mori	4	2
14156	Isochorismatase domain containing 1	Bombyx mori	4	2
20709	Ribosomal protein l11	Papilio xuthus	4	5
13136	28S ribosomal protein S15	Bombyx mori	3	0
10534	NADH dehydrogenase 1 alpha subcomplex subunit 8-like	Bombyx mori	3	3
7020	3-hydroxyacyl-CoA dehydrogenase	Bombyx mori	3	3
16391	60S ribosomal protein L30	Spodoptera frugiperda	3	0
32804	Acyl-CoA binding protein	Helicoverpa armigera	3	4
2820	ADP/ATP translocase	Helicoverpa armigera	3	5
12289	Thioredoxin	Helicoverpa armigera	3	5
1002	Aminopeptidase N-6	Helicoverpa armigera	3	0
6879	Aminopeptidase W07G4.4	Plutella xylostella	3	6
24807	Apolipophorin-like	Plutella xylostella	3	0
1534	Carboxyl/choline esterase CCE014a	Helicoverpa armigera	3	2
403	Chlorophyllide A binding protein precursor	Bombyx mori	3	4
5456	Chlorophyllide A binding protein precursor	Bombyx mori	3	8
7158	Chymotrypsin-like protease C9	Heliothis virescens	3	5
18645	Coiled-coil domain-containing protein 58	Amyelois transitella	3	0
1479	cytochrome c oxidase assembly protein cox15 homolog	Danaus plexippus	3	3
13222	Dipeptidase isoform a	Papilio xuthus	3	3
1309	Dipeptidyl peptidase iii	Bombyx mori	3	2
29583	Fatty acid binding protein	Helicoverpa assulta	3	5
24610	Fatty acid-binding protein 1	Helicoverpa armigera	3	0
30060	Fatty acid-binding protein 1	Helicoverpa armigera	3	2
6777	Ferritin subunit	Manduca sexta	3	0
14960	Glutathione s-transferase sigma 4	Spodoptera exigua	3	3
20300	H+transporting ATP synthase delta subunit	Bombyx mori	3	2
9564	Inorganic pyrophosphatase	Bombyx mori	3	2
354	Iron regulatory protein 1	Manduca sexta	3	3
932	Uncharacterized protein LOC101738136	Bombyx mori	3	4
4037	Luciferin 4-monooxygenase-like	Papilio polytes	3	0
23018	Cytochrome c oxidase subunit 6B1 isoform X2	Bombyx mori	3	4
5962	Mitochondrial matrix protein p32	Bombyx mori	3	0
14724	Mesencephalic astrocyte-derived neurotrophic factor homolog	Heliconius melpomene	3	2
11176	Ribosomal protein L20	Spodoptera frugiperda	3	3
15554	Ribosomal protein L37A	Bombyx mori	3	2
29854	60S ibosomal protein L38	Danaus plexippus	3	4
482	Saposin-like protein	Bombyx mori	3	3
10201	Serine protease 30	Mamestra configurata	3	3
772	Sodium-and chloride-dependent glycine transporter 2-like	Danaus plexippus	3	4
2674	Sterol carrier protein 2 3-oxoacyl- thiolase	Helicoverpa armigera	3	0
4965	Glycoside hydrolase	Spodoptera frugiperda	3	5
6957	Calmodulin	Trichinella pseudospiralis	3	3
11142	Trypsin-like protease	Helicoverpa armigera	3	4
14647	Serine protease 54	Mamestra configurata	3	0
19410	28S ribosomal protein	Amyelois transitella	2	0
31470	60S ribosomal protein L31	Papilio polytes	2	4
6595	Acetoacetyl-CoA thiolase	Bombyx mori	2	5
5247	Adenosine deaminase related growth factor	Mamestra brassicae	2	0
3398	Aldehyde dehydrogenase family 7 member a1 homolog	Danaus plexippus	2	0
9709	Aldo-keto reductase	Helicoverpa armigera	2	6
1950	Alpha-amylase	Helicoverpa armigera	2	3
5372	Aspartate aminotransferase, isoform X1	Amyelois transitella	2	4
19329	Calponin	Helicoverpa armigera	2	2
2041	Carboxyl/choline esterase CCE016a	Helicoverpa armigera	2	3
2129	Chaperonin containing t-complex polypeptide 1 beta subunit	Bombyx mori	2	0
8161	Chitin binding PM protein	Helicoverpa armigera	2	3
8690	d-3-phosphoglycerate dehydrogenase	Danaus plexippus	2	0
3707	delta)-delta( )-dienoyl- mitochondrial-like	Biston betularia	2	2
1729	Dolichyl-diphosphooligosaccharide--protein glycosyltransferase subunit 1	Chilo suppressalis	2	0
4497	Glycoside hydrolase	Danaus plexippus	2	2
4594	Glycoside hydrolase	Danaus plexippus	2	4
12732	Hypothetical protein KGM_15381	Danaus plexippus	2	2
2121	Isovaleryl coenzyme A dehydrogenase	Heliothis virescens	2	2
9196	Lipase	Helicoverpa armigera	2	0
5591	Lipid storage droplet protein 2	Manduca sexta	2	0
201	Long-chain-fatty-acid--ligase acsbg2 isoform x4	Bombyx mori	2	0
745	Methylcrotonoyl-carboxylase subunit mitochondrial-like	Oreochromis niloticus	2	3
23325	Thioredoxin 2	Spodoptera litura	2	0
6411	Mod(mdg4)-heS00531 isoform X3	Bombyx mori	2	0
5583	Peroxiredoxin-4-like isoform x1	Bombyx mori	2	4
4976	Enoyl-CoA delta isomerase 2	Bombyx mori	2	2
1204	Peroxisomal acyl-coenzyme A oxidase 3	Musca domestica	2	2
10493	Phosphatidylethanolamine binding protein isoform 2	Bombyx mori	2	0
3699	Polycalin	Helicoverpa armigera	2	2
2926	Metalloprotease	Danaus plexippus	2	3
7898	Metalloprotease	Danaus plexippus	2	0
1884	Probable peroxisomal acyl-coenzyme A oxidase 1-like	Bombyx mori	2	5
2748	Rab gdp-dissociation inhibitor	Danaus plexippus	2	0
33509	40S ribosomal protein S29	Papilio xuthus	2	2
10076	Serine protease SP1	Heliothis virescens	2	2
22320	Mitochondrial single-stranded DNA-binding protein	Bombyx mori	2	0
2485	succinate dehydrogenase iron-sulfur subunit	Papilio xuthus	2	0
1872	Tropomyosin-2 isoform 4	Bombyx mori	2	2
464	Tudor staphylococcus/micrococcal nuclease	Bombyx mori	2	2
26631	Uncharacterized protein LOC101738780	Bombyx mori	2	0
26446	Very long-chain specific acyl-CoA dehydrogenase	Amyelois transitella	2	0
2167	xaa-Pro aminopeptidase 1	Bombyx mori	2	3
3060	Eukaryotic translation initiation factor 3 subunit D	Amyelois transitella	2	0
12252	Mitochondrial ribosomal protein l2	Danaus plexippus	2	0
13466	Calcium-binding mitochondrial carrier protein aralar1	Amyelois transitella	2	0
18855	Ribosomal protein l28	Spodoptera frugiperda	2	4
13882	40S ribosomal protein S28	Bombyx mori	0	3
5987	Thiolase-4	Heliothis virescens	0	4
13192	Acyl-CoA binding protein	Heliothis virescens	0	2
6169	AF361483 inhibitor CI-8A	Bombyx mori	0	3
1766	Apolipophorin precursor protein	Manduca sexta	0	2
2013	Arylphorin	Helicoverpa armigera	0	10
2879	Arylphorin	Helicoverpa armigera	0	6
3804	Carboxyl/choline esterase CCE006b	Helicoverpa armigera	0	2
17126	Chlorophyllide A binding protein precursor	Bombyx mori	0	2
939	Coatomer protein complex subunit beta 2	Bombyx mori	0	3
1787	Dipeptidyl peptidase 4	Danaus plexippus	0	3
4221	Glutathione s-transferase	Papilio xuthus	0	2
1704	Heat shock protein 90	Helicoverpa armigera	0	2
541	Hypothetical protein KGM_17468	Aedes aegypti	0	6
770	Immunophilin fkbp46	Spodoptera frugiperda	0	2
7759	Isopentenyl-diphosphate delta isomerase	Bombyx mori	0	4
963	Laccase 1	Helicoverpa armigera	0	3
32315	NADH:ubiquinone dehydrogenase	Papilio xuthus	0	2
5700	Profilin	Bombyx mori	0	5
3853	Prolyl endopeptidase isoform 2	Papilio xuthus	0	2
21706	60 S ribosomal protein L44	Amyelois transitella	0	3
23419	Small nuclear ribonucleoprotein Sm D1	Bombyx mori	0	3
19066	Small nuclear ribonucleoprotein sm d2	Bombyx mori	0	3
15974	Translational controlled tumor protein	Helicoverpa armigera	0	3
7509	WD-repeat protein	Amyelois transitella	0	3
876	Xanthine dehydrogenase	Amyelois transitella	0	2
569	Probable E3 ubiquitin-protein ligase trip12-like isoform 2	Danaus plexippus	0	2
4605	Lipase 1 precursor	Helicoverpa armigera	0	3
5413	Peritrophin 1	Mamestra configurata	0	2
6611	Hydroxylysine kinase	Bombyx mori	0	5
7839	Vacuolar ATP synthase subunit F	Manduca sexta	0	2
20706	Chymotrypsin-like protease	Helicoverpa punctigera	0	2
21706	60 S ribosomal protein L44	Amyelois transitella	0	3
23419	Small nuclear ribonucleoprotein Sm D1	Bombyx mori	0	3
19066	Small nuclear ribonucleoprotein sm d2	Bombyx mori	0	3
15974	Translational controlled tumor protein	Helicoverpa armigera	0	3
7509	WD-repeat protein	Amyelois transitella	0	3
876	Xanthine dehydrogenase	Amyelois transitella	0	2
569	Probable E3 ubiquitin-protein ligase trip12-like isoform 2	Danaus plexippus	0	2
4605	Lipase 1 precursor	Helicoverpa armigera	0	3
5413	Peritrophin 1	Mamestra configurata	0	2
6611	Hydroxylysine kinase	Bombyx mori	0	5
7839	Vacuolar ATP synthase subunit F	Manduca sexta	0	2
20706	Chymotrypsin-like protease	Helicoverpa punctigera	0	2
